# Supplementary material
Source: PubMed Central journal article supplement (PMC3695553)
Supplement: NIHMS53638-supplement-S1.pdf [file NIHMS53638-supplement-S1.pdf]

| $\phi$ ( $\pm$ 1%) | 388 K ( $\pm$ 2 K)  | 398 K ( $\pm$ 2 K)  | 328 K ( $\pm$ 2 K)  | 298 K ( $\pm$ 2 K)  | 358 K ( $\pm$ 2 K)  | 378 K ( $\pm$ 2 K)  |
|--------------------|---------------------|---------------------|---------------------|---------------------|---------------------|---------------------|
| 0.55               | 24.58 ( $\pm$ 0.77) | 23.92 ( $\pm$ 0.76) | 15.55 ( $\pm$ 0.63) | 12.56 ( $\pm$ 0.59) | 18.14 ( $\pm$ 0.67) | 21.27 ( $\pm$ 0.72) |
| 0.60               | 30.48 ( $\pm$ 0.86) | 29.57 ( $\pm$ 0.84) | 20.80 ( $\pm$ 0.71) | 17.3 ( $\pm$ 0.66)  | 23.78 ( $\pm$ 0.76) | 27.67 ( $\pm$ 0.82) |
| 0.65               | 36.41 ( $\pm$ 0.95) | 36.56 ( $\pm$ 0.95) | 25.64 ( $\pm$ 0.78) | 21.96 ( $\pm$ 0.73) | 29.41 ( $\pm$ 0.84) | 33.56 ( $\pm$ 0.90) |
| 0.70               | 41.94 ( $\pm$ 1.03) | 42.15 ( $\pm$ 1.03) | 30.29 ( $\pm$ 0.85) | 26.07 ( $\pm$ 0.79) | 34.78 ( $\pm$ 0.92) | 39.05 ( $\pm$ 0.99) |
| 0.75               | 47.16 ( $\pm$ 1.11) | 47.83 ( $\pm$ 1.12) | 35.12 ( $\pm$ 0.93) | 30.47 ( $\pm$ 0.86) | 39.58 ( $\pm$ 0.99) | 43.84 ( $\pm$ 1.06) |
| 0.80               | 52.25 ( $\pm$ 1.18) | 53.21 ( $\pm$ 1.20) | 39.11 ( $\pm$ 0.99) | 33.96 ( $\pm$ 0.91) | 44.44 ( $\pm$ 1.07) | 48.79 ( $\pm$ 1.13) |
| 0.85               | 56.59 ( $\pm$ 1.25) | 57.75 ( $\pm$ 1.27) | 42.94 ( $\pm$ 1.04) | 37.45 ( $\pm$ 0.96) | 48.74 ( $\pm$ 1.13) | 52.72 ( $\pm$ 1.19) |
| 0.90               | 60.25 ( $\pm$ 1.30) | 61.80 ( $\pm$ 1.33) | 46.32 ( $\pm$ 1.09) | 40.37 ( $\pm$ 1.01) | 52.33 ( $\pm$ 1.18) | 56.83 ( $\pm$ 1.25) |
| 0.95               | 63.07 ( $\pm$ 1.35) | 64.37 ( $\pm$ 1.37) | 49.10 ( $\pm$ 1.14) | 42.63 ( $\pm$ 1.04) | 55.28 ( $\pm$ 1.23) | 59.95 ( $\pm$ 1.30) |
| 1.00               | 64.52 ( $\pm$ 1.37) | 66.81 ( $\pm$ 1.40) | 50.90 ( $\pm$ 1.16) | 44.33 ( $\pm$ 1.06) | 57.58 ( $\pm$ 1.26) | 62.25 ( $\pm$ 1.33) |
| 1.05               | 66.11 ( $\pm$ 1.39) | 68.64 ( $\pm$ 1.43) | 52.18 ( $\pm$ 1.18) | 45.37 ( $\pm$ 1.08) | 58.84 ( $\pm$ 1.28) | 63.89 ( $\pm$ 1.36) |
| 1.10               | 67.01 ( $\pm$ 1.41) | 69.47 ( $\pm$ 1.44) | 52.85 ( $\pm$ 1.19) | 45.90 ( $\pm$ 1.09) | 59.50 ( $\pm$ 1.29) | 64.45 ( $\pm$ 1.37) |
| 1.15               | 66.51 ( $\pm$ 1.40) | 68.99 ( $\pm$ 1.43) | 52.37 ( $\pm$ 1.19) | 45.39 ( $\pm$ 1.08) | 59.46 ( $\pm$ 1.29) | 64.39 ( $\pm$ 1.37) |
| 1.20               | 65.68 ( $\pm$ 1.39) | 67.95 ( $\pm$ 1.42) | 51.66 ( $\pm$ 1.17) | 44.68 ( $\pm$ 1.07) | 58.78 ( $\pm$ 1.28) | 62.79 ( $\pm$ 1.34) |
| 1.25               | 64.10 ( $\pm$ 1.36) | 66.75 ( $\pm$ 1.40) | 49.89 ( $\pm$ 1.15) | 43.21 ( $\pm$ 1.05) | 57.27 ( $\pm$ 1.26) | 60.93 ( $\pm$ 1.31) |
| 1.30               | 60.97 ( $\pm$ 1.31) | 64.29 ( $\pm$ 1.36) | 47.59 ( $\pm$ 1.11) | 41.2 ( $\pm$ 1.02)  | 54.69 ( $\pm$ 1.22) | 58.91 ( $\pm$ 1.28) |
| 1.35               | 57.30 ( $\pm$ 1.26) | 59.32 ( $\pm$ 1.29) | 44.38 ( $\pm$ 1.07) | 38.53 ( $\pm$ 0.98) | 51.44 ( $\pm$ 1.17) | 56.46 ( $\pm$ 1.25) |
| 1.40               | 53.54 ( $\pm$ 1.20) | 54.99 ( $\pm$ 1.22) | 41.03 ( $\pm$ 1.02) | 35.28 ( $\pm$ 0.93) | 47.22 ( $\pm$ 1.11) | 52.07 ( $\pm$ 1.18) |
| 1.45               | 48.76 ( $\pm$ 1.13) | 51.02 ( $\pm$ 1.17) | 36.13 ( $\pm$ 0.94) | 31.43 ( $\pm$ 0.87) | 43.35 ( $\pm$ 1.05) | 47.30 ( $\pm$ 1.11) |
| 1.50               | 43.48 ( $\pm$ 1.05) | 45.29 ( $\pm$ 1.08) | 31.94 ( $\pm$ 0.88) | 27.15 ( $\pm$ 0.81) | 38.72 ( $\pm$ 0.98) | 41.91 ( $\pm$ 1.03) |
| 1.55               | 38.26 ( $\pm$ 0.97) | 39.51 ( $\pm$ 0.99) | 26.96 ( $\pm$ 0.80) | 23.20 ( $\pm$ 0.75) | 33.48 ( $\pm$ 0.90) | 36.22 ( $\pm$ 0.94) |
| 1.60               | 32.72 ( $\pm$ 0.89) | 33.56 ( $\pm$ 0.90) | 21.58 ( $\pm$ 0.72) | 18.89 ( $\pm$ 0.68) | 28.38 ( $\pm$ 0.83) | 30.99 ( $\pm$ 0.86) |
| 1.65               | 27.62 ( $\pm$ 0.81) | 28.01 ( $\pm$ 0.82) | 16.82 ( $\pm$ 0.65) | 15.21 ( $\pm$ 0.63) | 23.40 ( $\pm$ 0.75) | 25.10 ( $\pm$ 0.78) |

Figure 1: 2-methyl furan laminar flame velocity experimental data with reported errors.

| $P_5$ / atm | $T_5$ / K | $\tau$ (d[CH*]/dt=MAX) / $\mu$ s |
|-------------|-----------|----------------------------------|
| 0.95        | 1254      | 1066.67                          |
| 0.92        | 1290      | 708.33                           |
| 0.99        | 1338.5    | 525                              |
| 1.01        | 1388.8    | 346.67                           |
| 0.99        | 1408.5    | 251.67                           |
| 0.9         | 1413.3    | 235                              |
| 1.07        | 1437.5    | 170                              |
| 0.99        | 1453.3    | 185                              |
| 1.19        | 1461.2    | 150.6                            |
| 1.19        | 1500      | 106.55                           |
| 1.01        | 1509      | 96.67                            |
| 1.19        | 1535      | 86.67                            |
| 1           | 1556      | 85                               |
| 1.02        | 1566.6    | 75                               |

Figure 2: Reflected shock parameters and ignition delay times for mixtures of 1% 2-methyl furan, 12% O<sub>2</sub> in Argon ( $\phi = 0.5$ ).

| $P_5$ / atm | $T_5$ / K | $\tau$ (d[CH*]/dt=MAX) / $\mu$ s |
|-------------|-----------|----------------------------------|
| 1           | 1336.6    | 1033.33                          |
| 1.03        | 1389      | 641.67                           |
| 1.05        | 1407      | 591.67                           |
| 0.99        | 1430.4    | 395.77                           |
| 1.02        | 1448      | 364.74                           |
| 0.81        | 1472.8    | 283.33                           |
| 1.02        | 1534.9    | 207.38                           |
| 1           | 1566.4    | 158.33                           |
| 0.9         | 1571.2    | 166.67                           |
| 0.98        | 1601      | 127.54                           |
| 0.98        | 1712      | 78.33                            |

Figure 3: Reflected shock parameters and ignition delay times for 1% 2-methyl furan, 6% O<sub>2</sub> in Argon ( $\phi = 1.0$ ).

| $P_5$ / atm | $T_5$ / K | $\tau$ (d[CH*]/dt=MAX) / $\mu$ s |
|-------------|-----------|----------------------------------|
| 0.94        | 1496.1    | 1083.33                          |
| 1.08        | 1498.8    | 1015.87                          |
| 1.06        | 1504.9    | 870.83                           |
| 1.02        | 1508.3    | 904.17                           |
| 1           | 1511.3    | 804.17                           |
| 1.06        | 1525.3    | 858.33                           |
| 1.11        | 1591.6    | 483.33                           |
| 1           | 1597.3    | 420.83                           |
| 0.95        | 1599.2    | 453.33                           |
| 1.11        | 1611.8    | 395                              |
| 1.13        | 1623.5    | 370.83                           |
| 1.01        | 1717.1    | 200                              |
| 0.99        | 1769.4    | 131.67                           |
| 0.97        | 1807.4    | 111.67                           |

Figure 4: Reflected shock parameters and ignition delay times for 1% 2-methyl furan, 3% O<sub>2</sub> in Argon ( $\phi = 2.0$ ).
