# Supplementary material
Source: PubMed Central journal article supplement (PMC3695553)

**Symbols represent experimental data from A. Lifshitz, C. Tamburu, R. Shashua, J. Phys. Chem. A 101 (6) 1997 1018-1029.**

**Lines represent model predictions, with solid lines corresponding to closed symbols and vice versa.**

**All simulations carried out with mixtures of 0.5% 2-methyl furan, 99.5% argon, pressures of 2.28 atmospheres and residence times of 2.05E-03 seconds.**

**All Simulations with 10 K reduction in simulated temperature.**

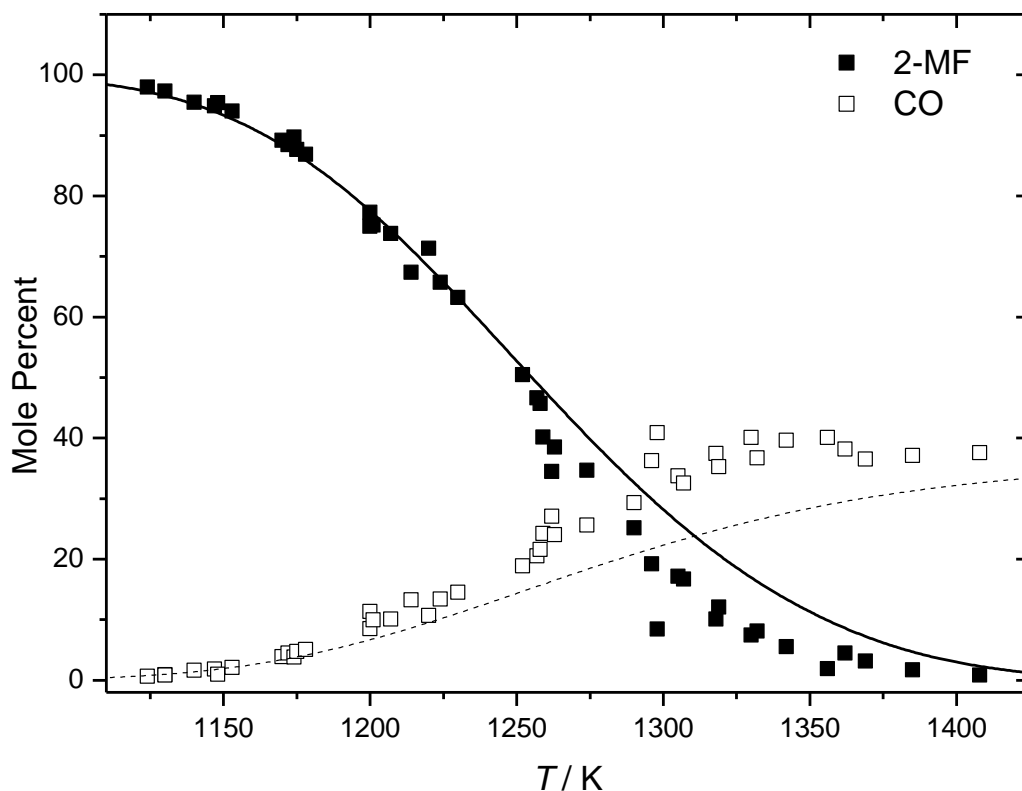

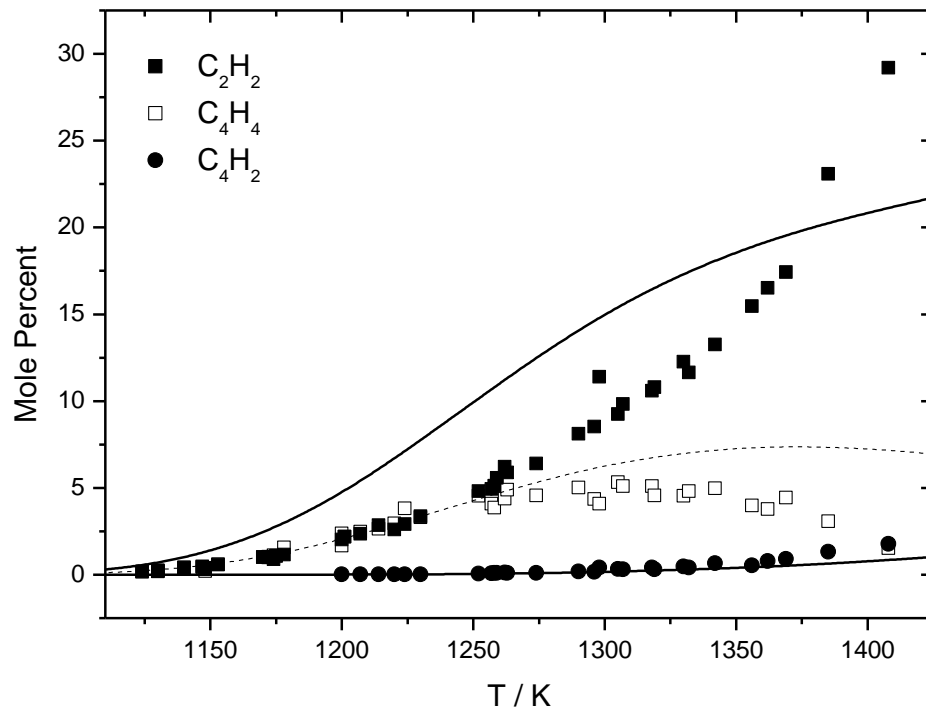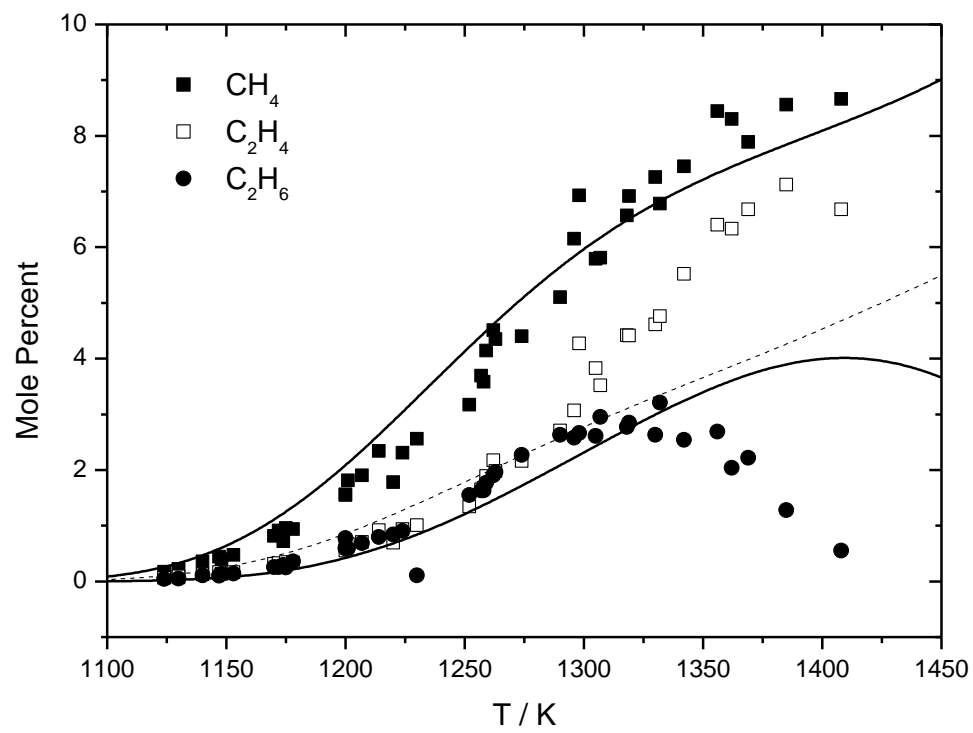

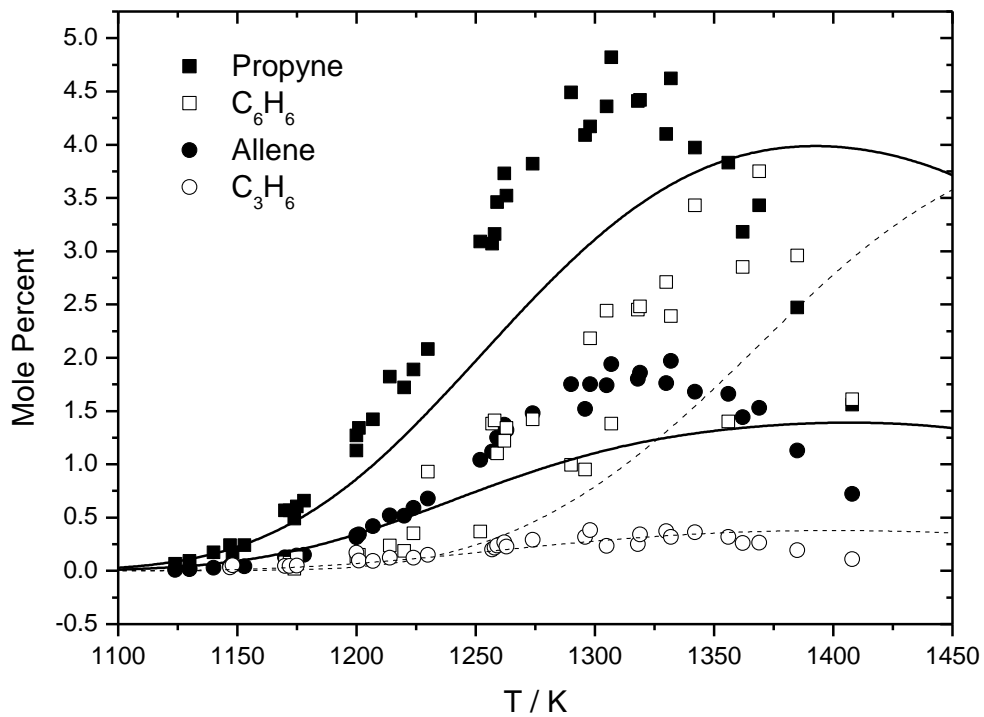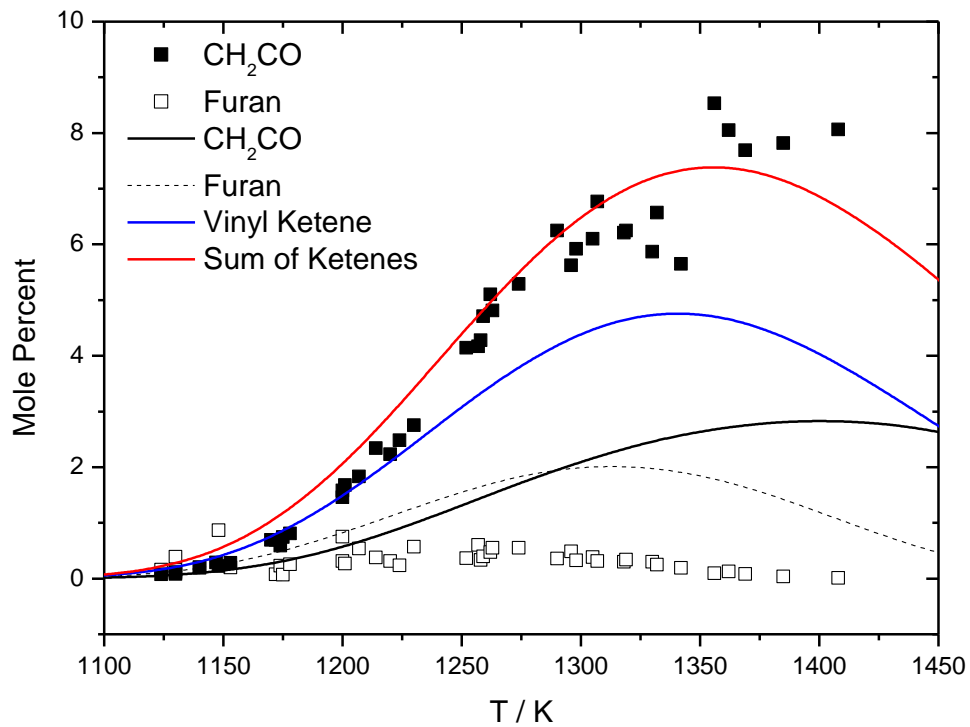

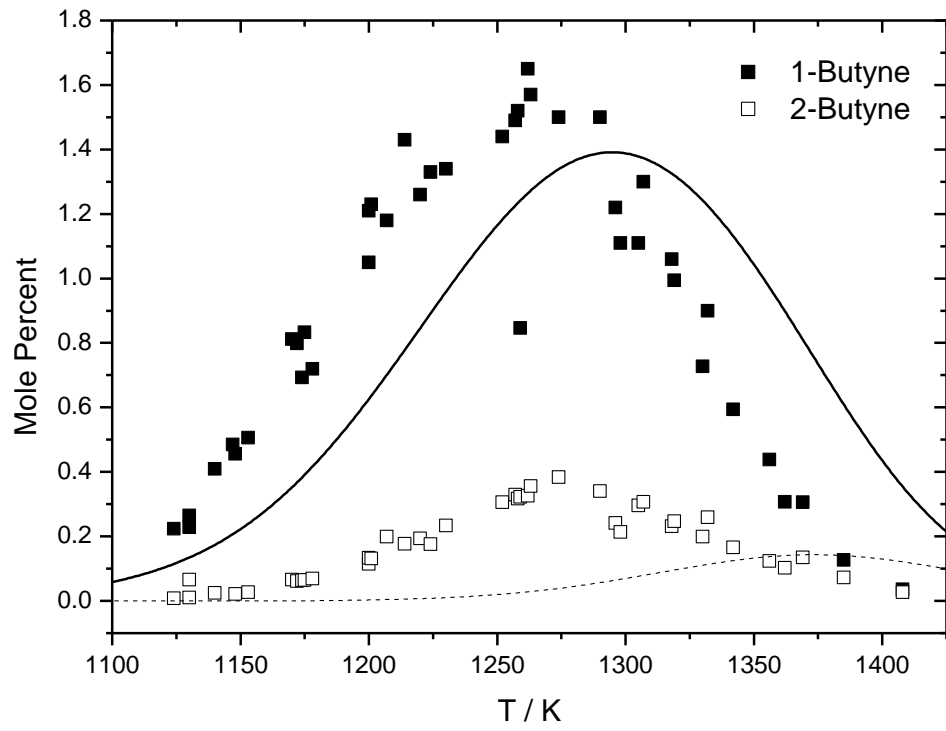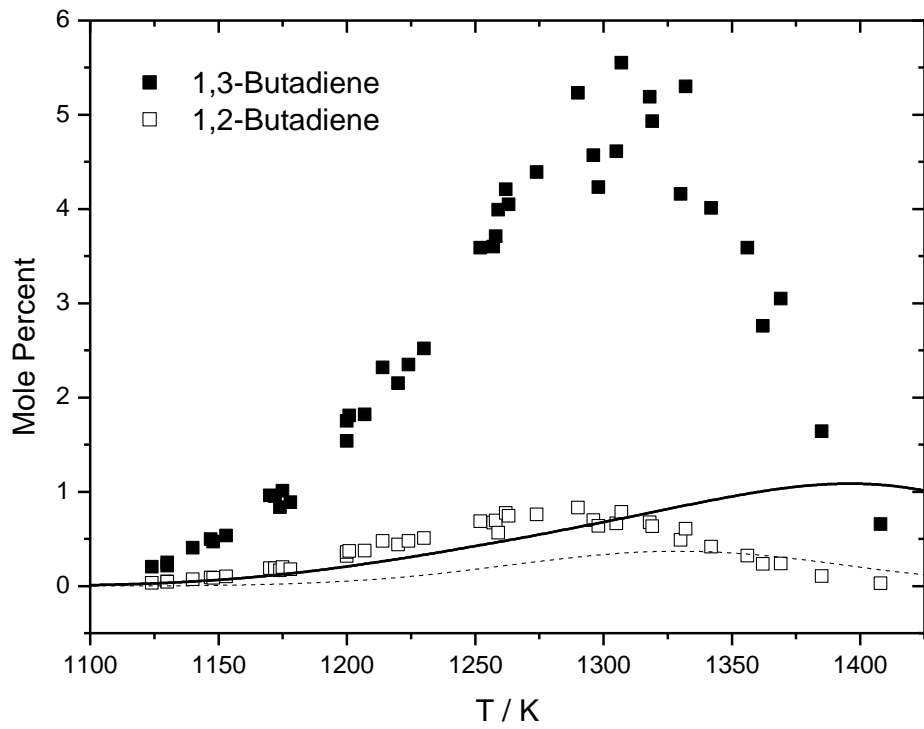

Supplement: NIHMS53638-supplement-S2.pdf [file NIHMS53638-supplement-S2.pdf]
